# Supplementary material for: Solvothermal synthesis of nanoscale BaTiO3 in benzyl alcohol–water mixtures and effects of manganese oxide coating to enhance the PTCR effect
Source: Royal Society of Chemistry journal article supplement (doi:10.1039/d2dt03307k), 2022-12-06
Supplement: d2dt03307k1.pdf [file d2dt03307k1.pdf]

## Supplementary Information

### **Solvothermal synthesis of nanoscale BaTiO<sub>3</sub> in benzyl alcohol-water mixtures and effects of manganese oxide coating to enhance the PTCR effect**

*Min Zhang,<sup>a</sup> Thomas Caldwell,<sup>a</sup> Andrew L. Hector,<sup>a</sup> Nuria Garcia-Araez<sup>a,b</sup> and Joseph Falvey<sup>a</sup>*

<sup>a</sup> School of Chemistry, University of Southampton, Highfield, Southampton SO17 1BJ, UK

<sup>b</sup> The Faraday Institution, Quad One, Harwell Campus, Didcot OX11 0RA, UK

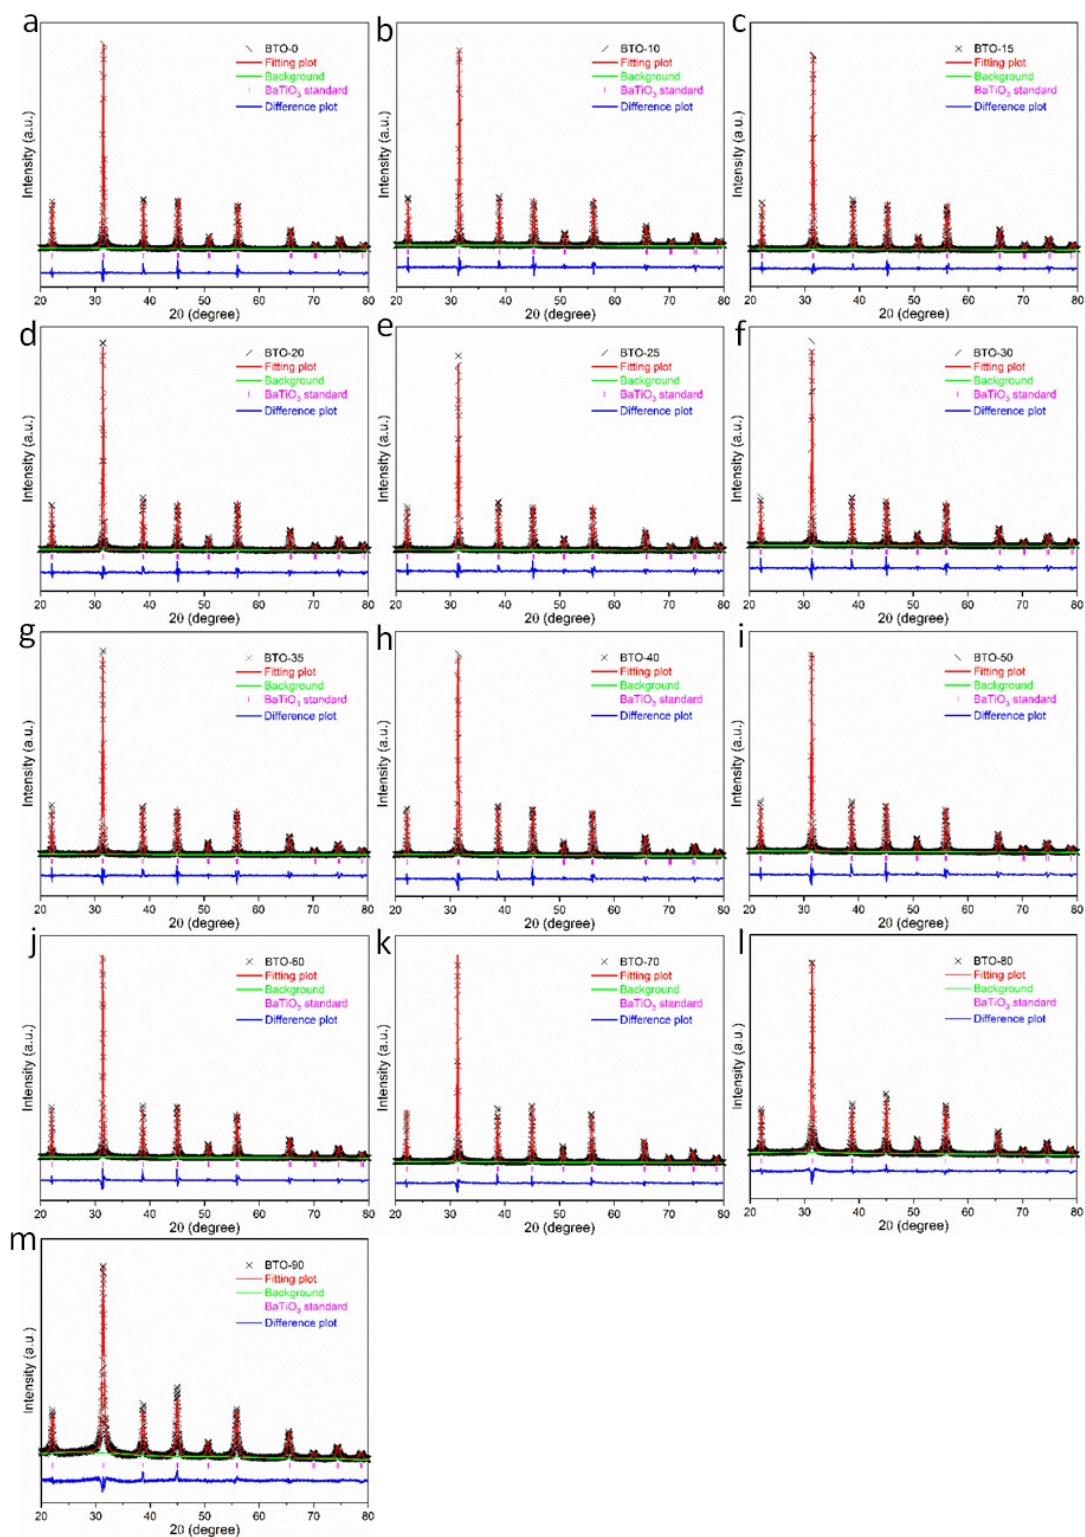

**Fig. S1** Rietveld fits to the XRD patterns of (a) BTO-0, (b) BTO-10, (c) BTO-15, (d) BTO-20, (e) BTO-25, (f) BTO-30, (g) BTO-35, (h) BTO-40, (i) BTO-50, (j) BTO-60, (k) BTO-70, (l) BTO-80 and (m) BTO-90 samples (sample labels explained in Table 1). The data points and Rietveld fits are overlaid as black crosses and red lines, respectively. The difference plots and backgrounds are shown in blue and green, respectively. The pink tick marks represent the allowed reflection positions for the tetragonal  $\text{BaTiO}_3$  structure with space group  $P4mm$ .

**Table S1** Lattice parameters ( $a$ ,  $c$ ), tetragonality ( $c/a$ ), Lorentzian crystallite size broadening term ( $L_x$ ) and reliability factors ( $R_{wp}$ ,  $R_p$ ) obtained from the Rietveld fits to the XRD patterns of BaTiO<sub>3</sub> samples (sample labels explained in Table 1).

| Sample | Lattice parameter |            | Tetragonality | Crystallite size broadening | Reliability factor |        |
|--------|-------------------|------------|---------------|-----------------------------|--------------------|--------|
|        | $a$ [Å]           | $c$ [Å]    | $c/a$         | $L_x$                       | $R_{wp}$           | $R_p$  |
| BTO-0  | 4.01277(14)       | 4.0254(2)  | 1.0031        | 8.23(9)                     | 0.1029             | 0.0810 |
| BTO-10 | 4.0109(2)         | 4.0261(2)  | 1.0038        | 6.11(11)                    | 0.1408             | 0.1068 |
| BTO-15 | 4.0120(2)         | 4.0261(2)  | 1.0035        | 6.39(11)                    | 0.1366             | 0.1009 |
| BTO-20 | 4.0113(2)         | 4.0261(2)  | 1.0037        | 6.10(11)                    | 0.1390             | 0.1051 |
| BTO-25 | 4.0119(2)         | 4.0276(3)  | 1.0039        | 6.94(13)                    | 0.1506             | 0.1138 |
| BTO-30 | 4.0132(2)         | 4.0279(2)  | 1.0037        | 6.20(11)                    | 0.1458             | 0.1111 |
| BTO-35 | 4.0136(2)         | 4.0290(3)  | 1.0038        | 6.79(12)                    | 0.1500             | 0.1151 |
| BTO-40 | 4.0155(2)         | 4.0301(2)  | 1.0036        | 7.34(10)                    | 0.1197             | 0.0918 |
| BTO-50 | 4.0190(2)         | 4.0327(2)  | 1.0034        | 7.09(11)                    | 0.1297             | 0.1005 |
| BTO-60 | 4.02402(14)       | 4.0340(2)  | 1.0025        | 7.47(10)                    | 0.1219             | 0.0941 |
| BTO-70 | 4.02742(15)       | 4.0323(3)  | 1.0012        | 5.87(8)                     | 0.1075             | 0.0838 |
| BTO-80 | 4.0255(4)         | 4.0258(8)  | 1.0001        | 12.94(11)                   | 0.0967             | 0.0748 |
| BTO-90 | 4.0291(5)         | 4.0319(11) | 1.0007        | 28.06(22)                   | 0.0846             | 0.0677 |

**Table S2** Mass losses of BaTiO<sub>3</sub> samples synthesised via a solvothermal method with various benzyl alcohol percentages (0, 20%, 40%, 60%, 80% and 90%) in benzyl alcohol/water solvent mixtures.

| Percentage of benzyl alcohol (%) | Mass loss (%) |
|----------------------------------|---------------|
| 0                                | 1.2           |
| 20                               | 0.3           |
| 40                               | 0.9           |
| 60                               | 0.8           |
| 80                               | 5.0           |
| 90                               | 7.6           |

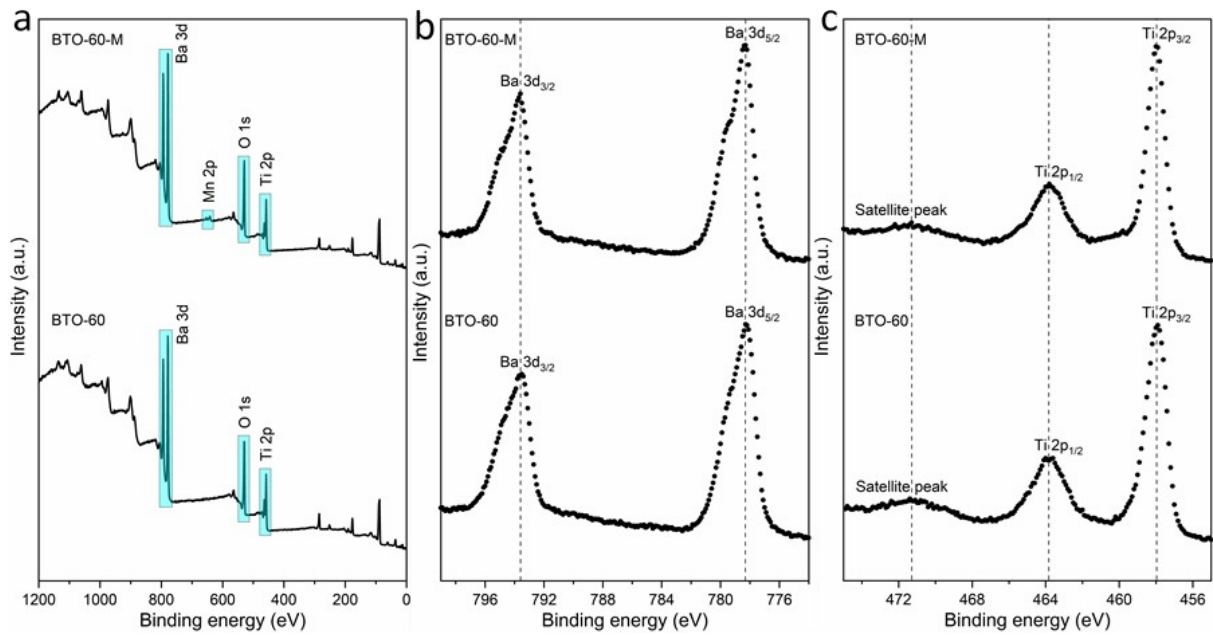

**Fig. S2** XPS spectra of BTO-60 and BTO-60-M samples: (a) survey spectra, (b) Ba 3*d* and (c) Ti 2*p* (sample labels explained in Table 2).

**Table S3** Lattice parameters (*a*, *c*), tetragonality (*c/a*), Lorentzian crystallite size broadening term (*L<sub>x</sub>*) and reliability factors (*R<sub>wp</sub>*, *R<sub>p</sub>*) obtained from the Rietveld fits to the XRD patterns of the uncoated and manganese oxide coated BaTiO<sub>3</sub> samples (sample labels explained in Table 2).

| Sample   | Lattice parameter |              | Tetragonality | Crystallite size broadening | Reliability factor    |                      |
|----------|-------------------|--------------|---------------|-----------------------------|-----------------------|----------------------|
|          | <i>a</i> [Å]      | <i>c</i> [Å] | <i>c/a</i>    | <i>L<sub>x</sub></i>        | <i>R<sub>wp</sub></i> | <i>R<sub>p</sub></i> |
| BTO-60   | 4.02402(14)       | 4.0340(2)    | 1.0025        | 7.47(10)                    | 0.1219                | 0.0941               |
| BTO-60-M | 4.00688(12)       | 4.0135(2)    | 1.0017        | 6.84(8)                     | 0.0943                | 0.0718               |
